# Supplementary material
Source: ML conference proceedings conference paper supplement (https://openaccess.thecvf.com/content/ICCV2023/html/Nugroho_Audio-Visual_Glance_Network_ICCV_2023_paper.html)
Supplement: Supplementary file 2 [file Nugroho_Audio-Visual_Glance_Network_ICCV_2023_supplemental.zip]

Archive with 2 entries (2 files):
- 11528 Supplementary/11528_supplementary.pdf
- 11528 Supplementary/AVGN Demo.mp4
